# Supplementary material
Source: PubMed Central journal article supplement (PMC10160883)
Supplement: tpmd220371.SD1.pdf [file tpmd220371.SD1.pdf]

## Supplemental Materials

**Table SM1.** Number of households with complete survey data and mosquito collections, by community and month

|                                                           | Colon  |       |         |           | Sto     | Sta   |       |
|-----------------------------------------------------------|--------|-------|---------|-----------|---------|-------|-------|
|                                                           | Borbón | Eloy  | Timbire | Maldonado | Domingo | María | Total |
| <b>Total occupied households as per 2021 study census</b> | 978    | 216   | 194     | 307       | 112     | 106   | 1,913 |
| <b>Feb, 2021</b>                                          | 272    | 60    | 49      | 49        | 68      | 27    | 507   |
| <b>Mar, 2021</b>                                          | 293    | 63    | 48      | 48        | 72      | 38    | 546   |
| <b>Apr, 2021</b>                                          | 297    | 64    | 52      | 52        | 71      | 40    | 556   |
| <b>May, 2021</b>                                          | 296    | 62    | 50      | 50        | 72      | 40    | 551   |
| <b>Jun, 2021</b>                                          | 297    | 61    | 49      | 49        | 72      | 39    | 550   |
| <b>Jul, 2021</b>                                          | 295    | 64    | 49      | 49        | 70      | 40    | 549   |
| <b>Aug, 2021</b>                                          | 295    | 63    | 50      | 50        | 70      | 40    | 549   |
| <b>Sep, 2021</b>                                          | 291    | 62    | 52      | 52        | 68      | 38    | 543   |
| <b>Oct, 2021</b>                                          | 296    | 64    | 52      | 52        | 71      | 40    | 555   |
| <b>Nov, 2021</b>                                          | 296    | 61    | 49      | 49        | 72      | 40    | 550   |
| <b>Dec, 2021</b>                                          | 294    | 63    | 51      | 51        | 73      | 40    | 552   |
| <b>Jan, 2022</b>                                          | 292    | 62    | 52      | 52        | 71      | 40    | 549   |
| <b>Feb, 2022</b>                                          | 298    | 61    | 51      | 51        | 72      | 40    | 554   |
| <b>Mar, 2022</b>                                          | 298    | 63    | 52      | 52        | 72      | 38    | 555   |
| <b>Apr, 2022</b>                                          | 296    | 63    | 51      | 51        | 72      | 40    | 554   |
| <b>May, 2022</b>                                          | 299    | 63    | 51      | 51        | 72      | 39    | 556   |
| <b>July, 2022</b>                                         | 296    | 63    | 47      | 47        | 72      | 40    | 550   |
| <b>Total</b>                                              | 5,001  | 1,062 | 855     | 1,210     | 539     | 659   | 9,326 |

**Table SM2.** Incidence rate ratios (IRR), estimated from Unadjusted negative binomial regression of the relationship between total resting mosquitoes resting indoors and self-reported biting rate questions

| Bites, Day                                          | IRR           | 95% Confidence Interval |
|-----------------------------------------------------|---------------|-------------------------|
| None                                                | <ref><br>0.99 | <ref><br>(0.92, 1.07)   |
| Rarely                                              | 1.20          | (1.12, 1.29)            |
| Sometimes                                           | 1.32          | (1.20, 1.44)            |
| Often                                               |               |                         |
| Bites, Night                                        | IRR           | 95% Confidence Interval |
| None                                                | <ref><br>1.27 | <ref><br>(1.12, 1.44)   |
| Rarely                                              | 1.45          | (1.28, 1.63)            |
| Sometimes                                           | 1.50          | (1.32, 1.70)            |
| Often                                               |               |                         |
| Bites, Dawn/Dusk                                    | IRR           | 95% Confidence Interval |
| None                                                | <ref><br>1.11 | <ref><br>(1.02, 1.22)   |
| Rarely                                              | 1.29          | (1.18, 1.41)            |
| Sometimes                                           | 1.38          | (1.26, 1.51)            |
| Often                                               |               |                         |
| Biting Rate indoors the day before the survey       | IRR           | 95% Confidence Interval |
| None                                                | <ref><br>1.32 | <ref><br>(1.19, 1.47)   |
| Rarely                                              | 1.57          | (1.41, 1.74)            |
| Sometimes                                           | 1.63          | (1.45, 1.84)            |
| Often                                               |               |                         |
| Bites to children indoors the day before the survey | IRR           | 95% Confidence Interval |
| None                                                | <ref><br>1.01 | <ref><br>(0.97, 1.06)   |
| Rarely                                              | 1.17          | (1.12, 1.23)            |
| Sometimes                                           | 1.27          | (1.18, 1.37)            |
| Often                                               |               |                         |

<ref> = reference category

**Table SM3.** Incidence rate ratios (IRR), estimated from unadjusted negative binomial regression of the relationship between total resting mosquitoes resting indoors and self-reported bite frequency categories during the day, stratified by community.

|                              | IRR           | 95% Confidence Interval |
|------------------------------|---------------|-------------------------|
| <b>Borbón (n=5,001)</b>      |               |                         |
| None                         | <ref><br>0.92 | <ref><br>(0.85, 0.99)   |
| Rarely                       | 1.20          | (1.12, 1.30)            |
| Sometimes                    | 1.38          | (1.21, 1.56)            |
| Often                        |               |                         |
| <b>Colon Eloy (n=1,062)</b>  |               |                         |
| None                         | <ref><br>1.06 | <ref><br>(0.24, 4.79)   |
| Rarely                       | 1.16          | (0.26, 5.22)            |
| Sometimes                    | 1.30          | (0.29, 5.85)            |
| Often                        |               |                         |
| <b>Timbire (n=855)</b>       |               |                         |
| None                         | <ref><br>0.56 | <ref><br>(0.32, 0.97)   |
| Rarely                       | 0.70          | (0.39, 1.23)            |
| Sometimes                    | 0.91          | (0.45, 1.84)            |
| Often                        |               |                         |
| <b>Maldonado (n=1,210)</b>   |               |                         |
| None                         | <ref><br>1.35 | <ref><br>(0.55, 3.34)   |
| Rarely                       | 1.21          | (0.49, 3.00)            |
| Sometimes                    | 1.34          | (0.54, 3.33)            |
| Often                        |               |                         |
| <b>Santo Domingo (n=539)</b> |               |                         |
| None                         | <ref><br>1.00 | <ref><br>(0.73, 1.39)   |
| Rarely                       | 1.27          | (0.91, 1.76)            |
| Sometimes                    | 1.83          | (1.26, 2.65)            |
| Often                        |               |                         |
| <b>Santa Maria (N=659)</b>   |               |                         |
| None                         | <ref>         | <ref>                   |

|           |      |              |
|-----------|------|--------------|
|           | 1.15 | (0.92, 1.46) |
| Rarely    |      |              |
|           | 1.87 | (1.52, 2.31) |
| Sometimes |      |              |
|           | 1.04 | (0.83, 1.32) |
| Often     |      |              |

---

<ref> = reference category

**Table SM4.** Incidence rate ratios (IRR), estimated from unadjusted negative binomial regression of the relationship between total resting mosquitoes resting indoors and self-reported bite frequency categories during the day, stratified by species

| <b><i>Culex</i>:</b> |       |                         |
|----------------------|-------|-------------------------|
| Bites, Day           | IRR   | 95% Confidence Interval |
| None                 | <ref> | <ref>                   |
| Rarely               | 1.05  | (0.98, 1.14)            |
| Sometimes            | 1.27  | (1.18, 1.37)            |
| Often                | 1.39  | (1.27, 1.54)            |
| <b><i>Aedes</i>:</b> |       |                         |
| Bites, Day           | IRR   | 95% Confidence Interval |
| None                 | <ref> | <ref>                   |
| Rarely               | 0.70  | (0.62, 0.80)            |
| Sometimes            | 0.81  | (0.71, 0.92)            |
| Often                | 0.92  | (0.78, 1.10)            |

<ref> = reference category

**Table SM5.** Incidence rate ratios (IRR), estimated from unadjusted negative binomial regression of the relationship between total resting male and female *Aedes* and *Culex* resting indoors and self-reported bite frequency categories during the day.

| <b>For male mosquitoes only:</b>   |       |                         |
|------------------------------------|-------|-------------------------|
| Bites, Day                         | IRR   | 95% Confidence Interval |
| None                               | <ref> | <ref>                   |
| Rarely                             | 1.01  | (0.93, 1.10)            |
| Sometimes                          | 1.22  | (1.12, 1.32)            |
| Often                              | 1.33  | (1.20, 1.48)            |
| <b>For female mosquitoes only:</b> |       |                         |
| Bites, Day                         | IRR   | 95% Confidence Interval |
| None                               | <ref> | <ref>                   |
| Rarely                             | 0.99  | (0.91, 1.07)            |
| Sometimes                          | 1.20  | (1.11, 1.30)            |
| Often                              | 1.34  | (1.22, 1.48)            |

<ref> = reference category

**Supplemental Material 2.** Survey questions and possible responses in English and the original language (Spanish).

### **Questions**

Respond to the following questions, THINKING ABOUT YESTERDAY.

G1. Approximately how often did mosquitoes bite you during the day?

G2. Approximately how often did mosquitoes bite you at night?

G3. Approximately how often did mosquitoes bite you at dawn & at dusk?

G4. Thinking about yesterday during all times of the day, how often did mosquitoes bite you while you were in the house?

G5. Thinking about yesterday at all times of the day, how often did mosquitoes bite your children while they were in the house?

### **Questions in the survey language**

Responda a las siguientes preguntas, PENSANDO EN AYER.

G1. ¿Aproximadamente con qué frecuencia le picaban los mosquitos durante el día?

G2. ¿Aproximadamente con qué frecuencia le picaban los mosquitos durante la noche?

G3. ¿Aproximadamente con qué frecuencia le picaban los mosquitos durante el amanecer y el atardecer?

G4. ¿Aproximadamente con qué frecuencia le picaban los mosquitos a usted mientras estaba dentro del hogar, durante cualquier hora?

G5. ¿Aproximadamente con qué frecuencia le picaban los mosquitos a su niño mientras estaba dentro del hogar, durante cualquier hora?

### **Responses**

None, Rarely, Often, Frequently Ninguna Vez, Raramente, Algunas Veces, Frecuentemente
